# Supplementary material for: An Anaerobic Environment Drives the Harboring of Helicobacter pylori within Candida Yeast Cells
Source: MDPI journal article supplement (doi:10.3390/biology11050738), 2022-05-12
Supplement: s1 [file s1]

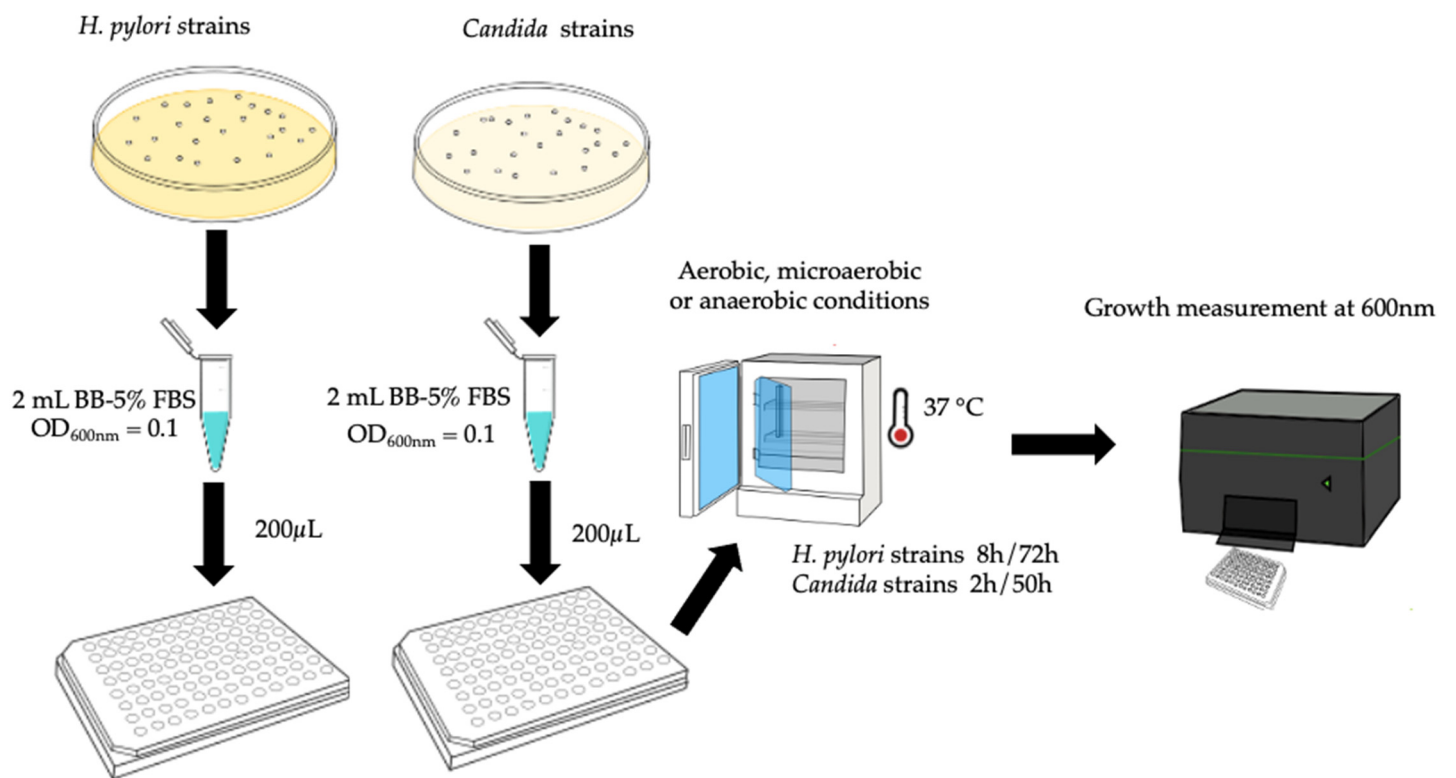

**Figure S1.** Schematic representation of the methodology to obtain the growth curves of *H. pylori* and *Candida* strains cultured under aerobic, microaerobic or anaerobic conditions.

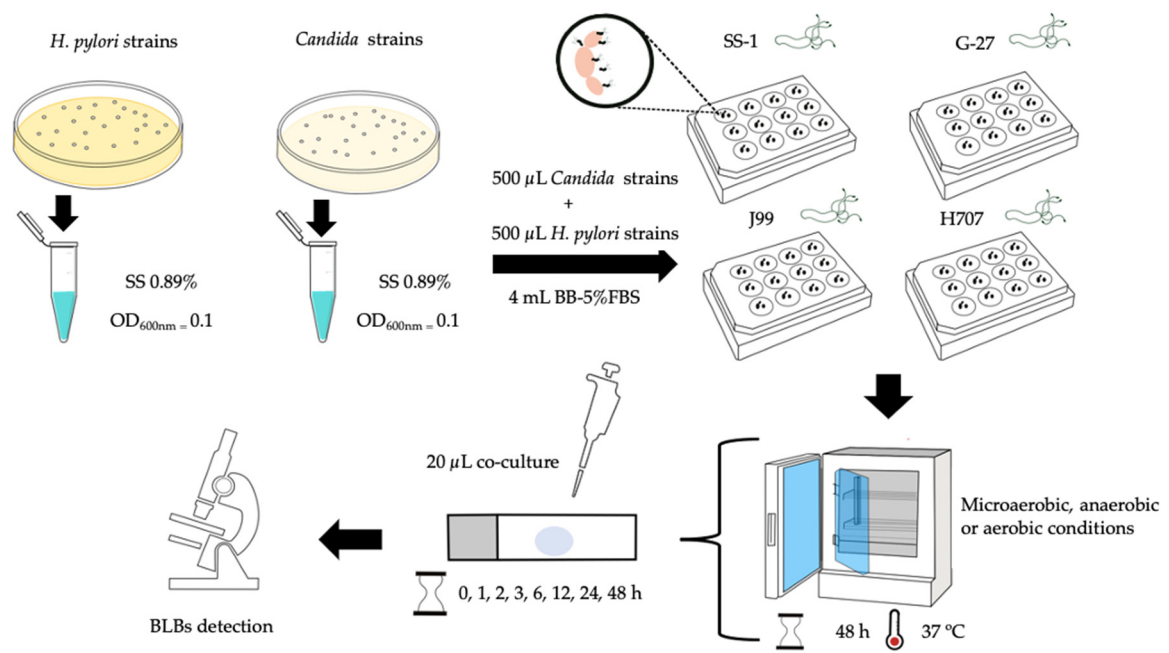

**Figure S2.** Schematic representation of the methodology to co-culture *H. pylori* strains with *Candida* strains.

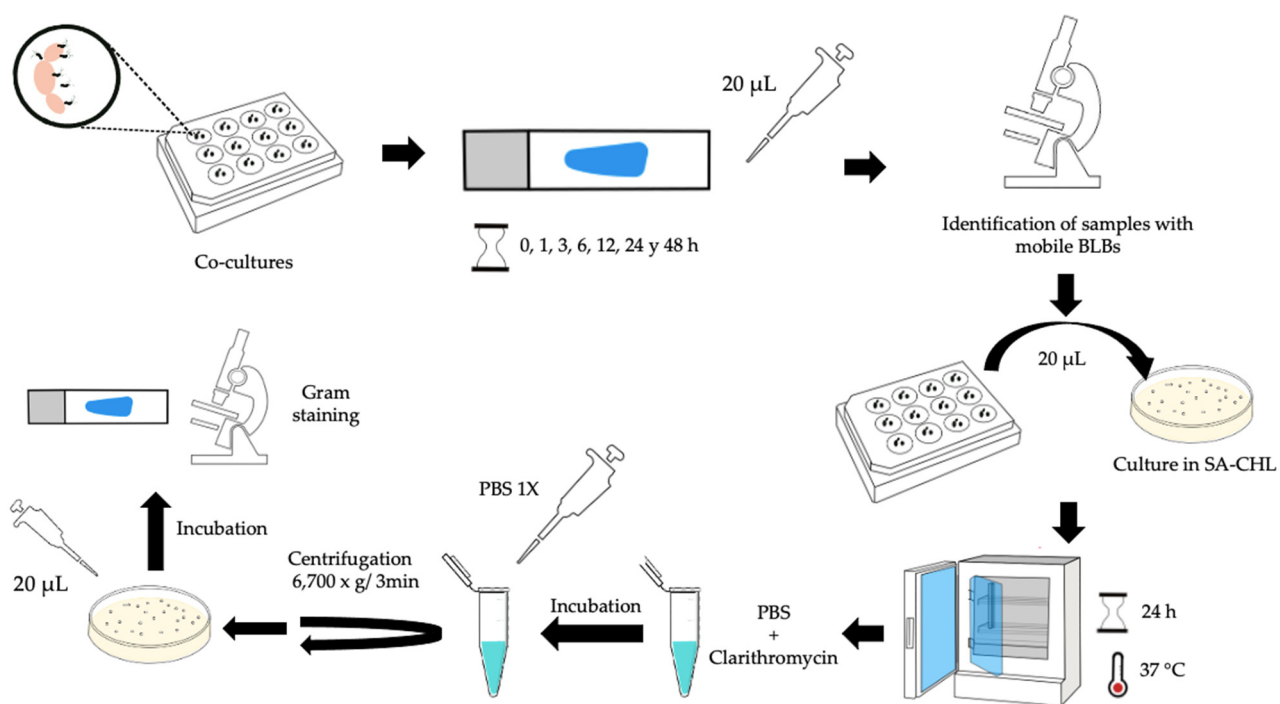

**Figure S3.** Schematic representation of the methodology to search for intra-yeast bacteria-like bodies (BLBs).

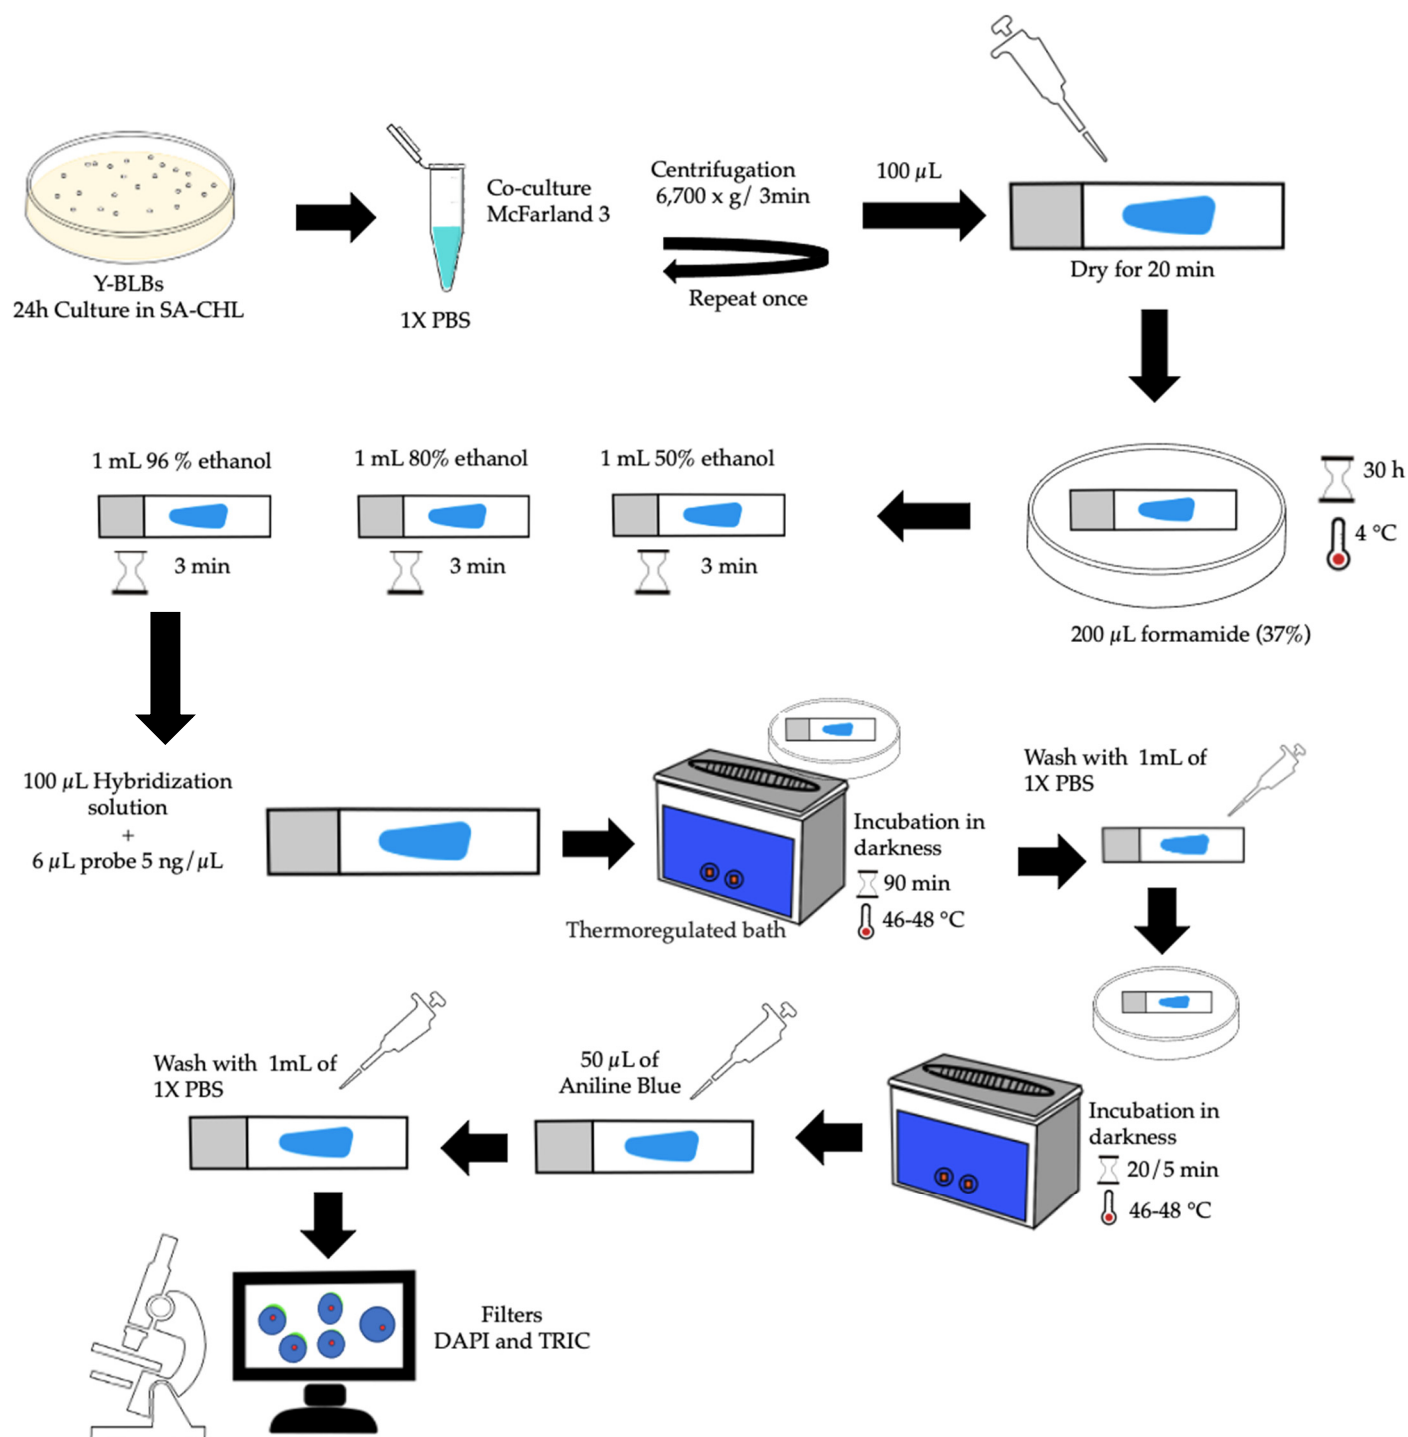

**Figure S4.** Schematic representation of the methodology to identify the intra-yeast bacteria-like bodies (BLBs) using the FISH technique.

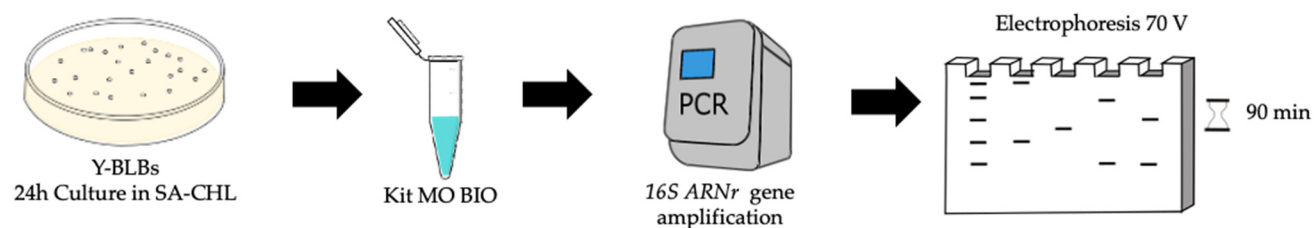

**Figure S5.** Schematic representation of the methodology to detect the 16S rRNA gene of *H. pylori* in the total DNA of yeasts cells.

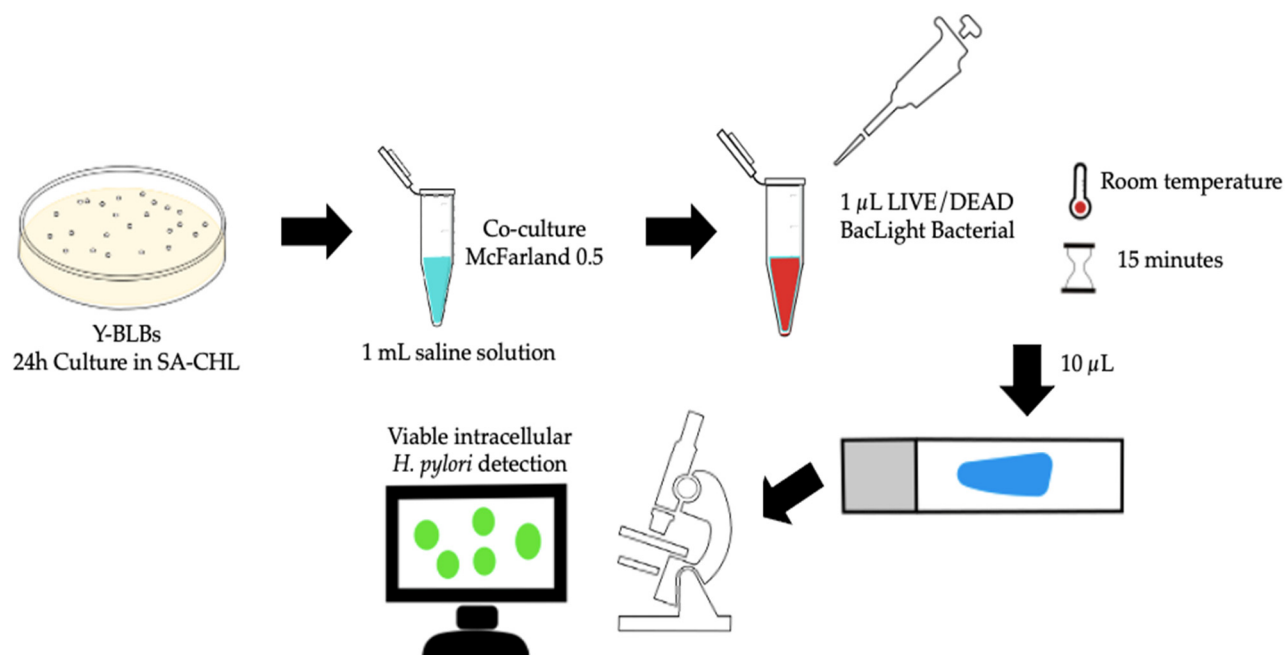

**Figure S6.** Schematic representation of the methodology to confirm the viability of intra-vacuolar *H. pylori* within yeasts.
